# Supplementary material for: Ionic liquid induced sphere-to-ribbon transition in the block copolymer mediated synthesis of silver nanoparticles
Source: Royal Society of Chemistry journal article supplement (doi:10.1039/c3ra41138a), 2013-01-01

## Electronic Supplementary Information

### **Ionic Liquid Induced Sphere-to-Ribbon Transition in Block Copolymer Mediated Synthesis of Silver Nanoparticles**

Saurabh S. Soni,<sup>\*a</sup> Rohit L. Vekariya<sup>a</sup> and Vinod K. Aswal<sup>b</sup>

#### Synthesis and Characterization of ionic liquids:

##### **Reaction Scheme of modified ionic liquids [C<sub>n</sub>PyDs (n = 4, 6, 8)]:-**

The modified ionic liquids, N - Alkyl pyridinium dodecyl sulphate (C<sub>n</sub>PyDs) was synthesised from the reaction between sodium dodecyl sulphate (SDS) and N - Alkyl pyridinium chloride (C<sub>n</sub>PyCl) in acetone under mild heating. The C<sub>n</sub>PyCl-SDS-acetone mixture was filtered to remove sodium chloride and the filtrate was kept in oven at 75°C under vacuum in order to remove any residual acetone. The resultant, [C<sub>n</sub>PyDs] products were light yellow to brown waxy type material which have partial solubility in water. The modified ionic liquids were characterized by <sup>1</sup>H- and <sup>13</sup>C-NMR and by FTIR.

General reaction scheme for the synthesized ionic liquids [C<sub>n</sub>PyCl] and its modification for [C<sub>n</sub>PyDs]

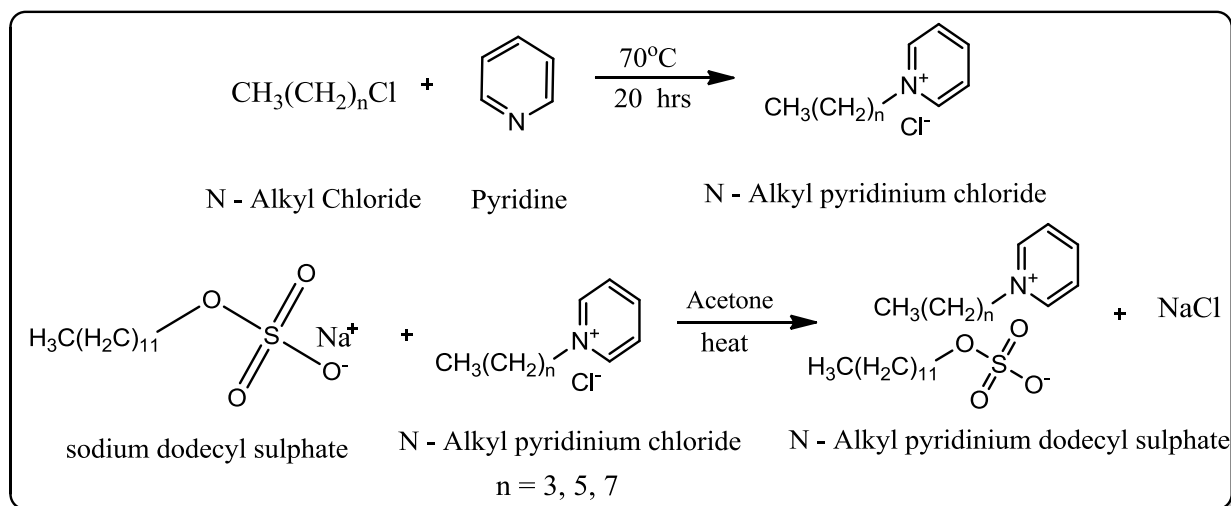

### <sup>1</sup>H-NMR spectra of C<sub>1</sub>PyMs

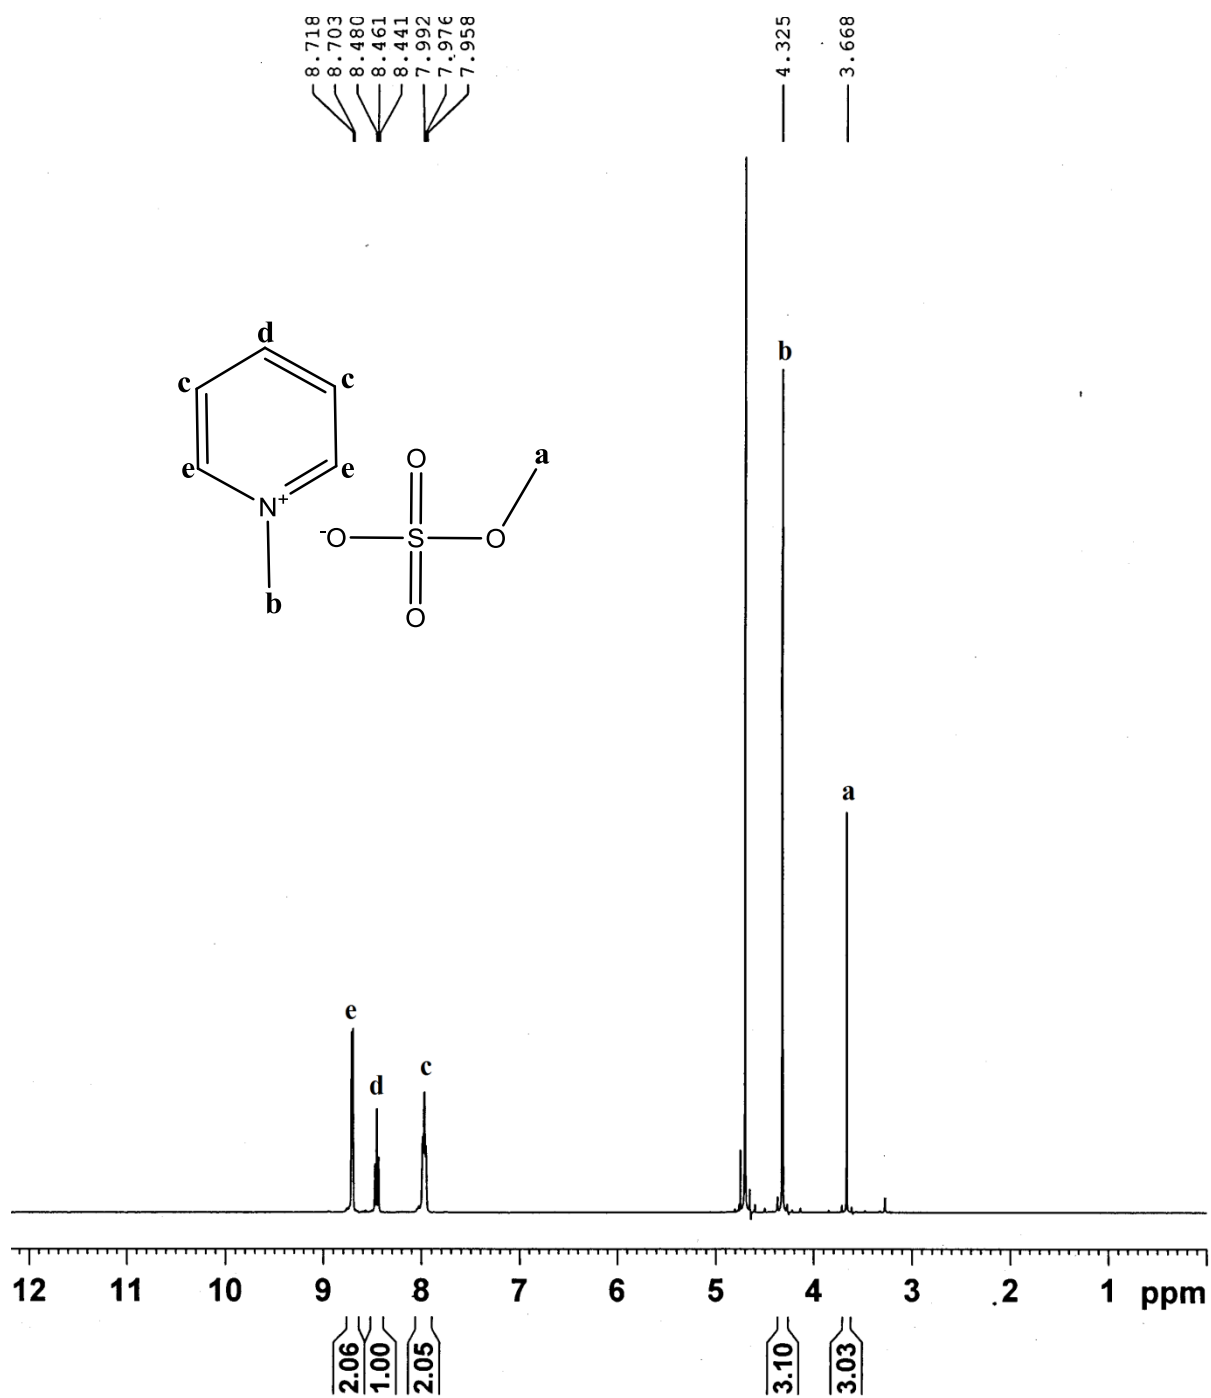

### <sup>1</sup>H-NMR spectra of C<sub>2</sub>PyEs

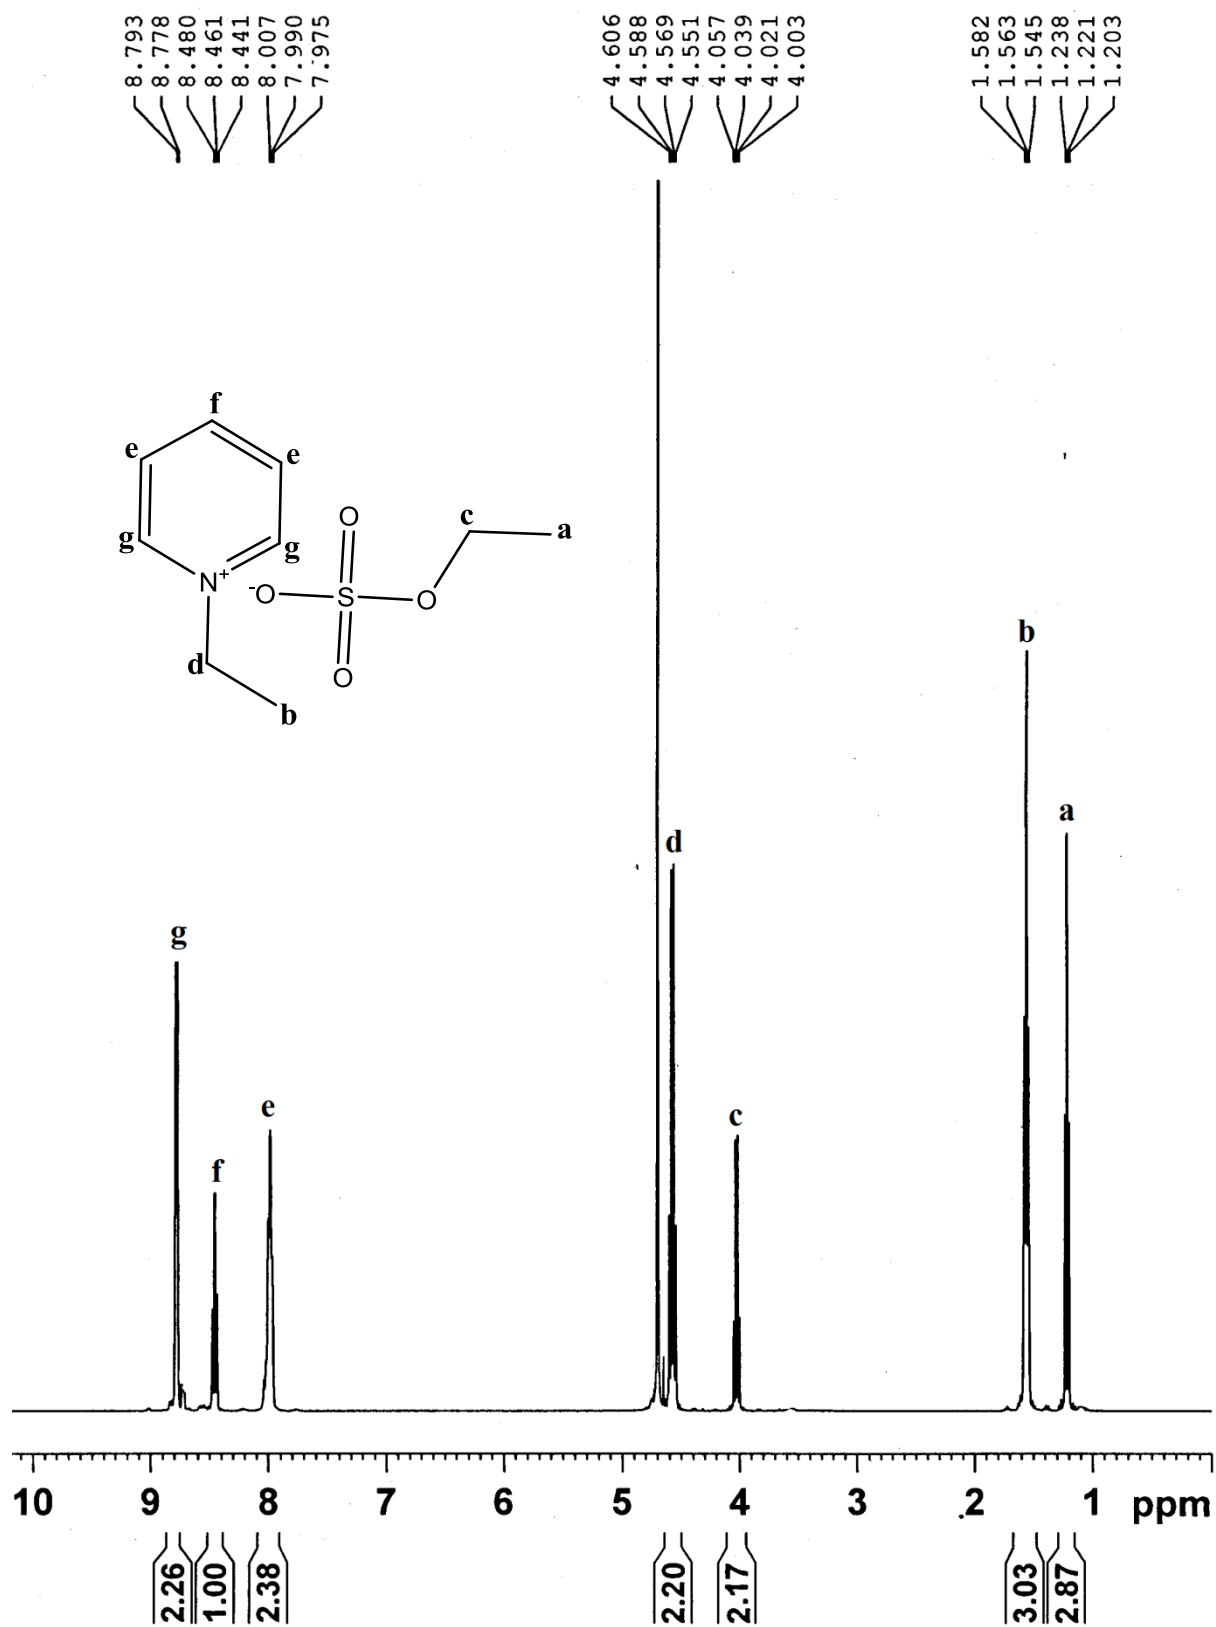

Supplement: c3ra41138a.pdf [file c3ra41138a.pdf]
